# Supplementary material for: Direct prediction of Homologous Recombination Deficiency from routine histology in ten different tumor types with attention-based Multiple Instance Learning: a development and validation study
Source: PubMed Central journal article supplement — medRxiv. 2023 Mar 10:2023.03.08.23286975. Preprint. [Version 1] doi: 10.1101/2023.03.08.23286975 (PMC10029072; doi:10.1101/2023.03.08.23286975), 2023-03-10
Supplement: NIHPP2023.03.08.23286975v1-supplement-2.pdf [file NIHPP2023.03.08.23286975v1-supplement-2.pdf]

667 **Supplementary Figures and Tables**

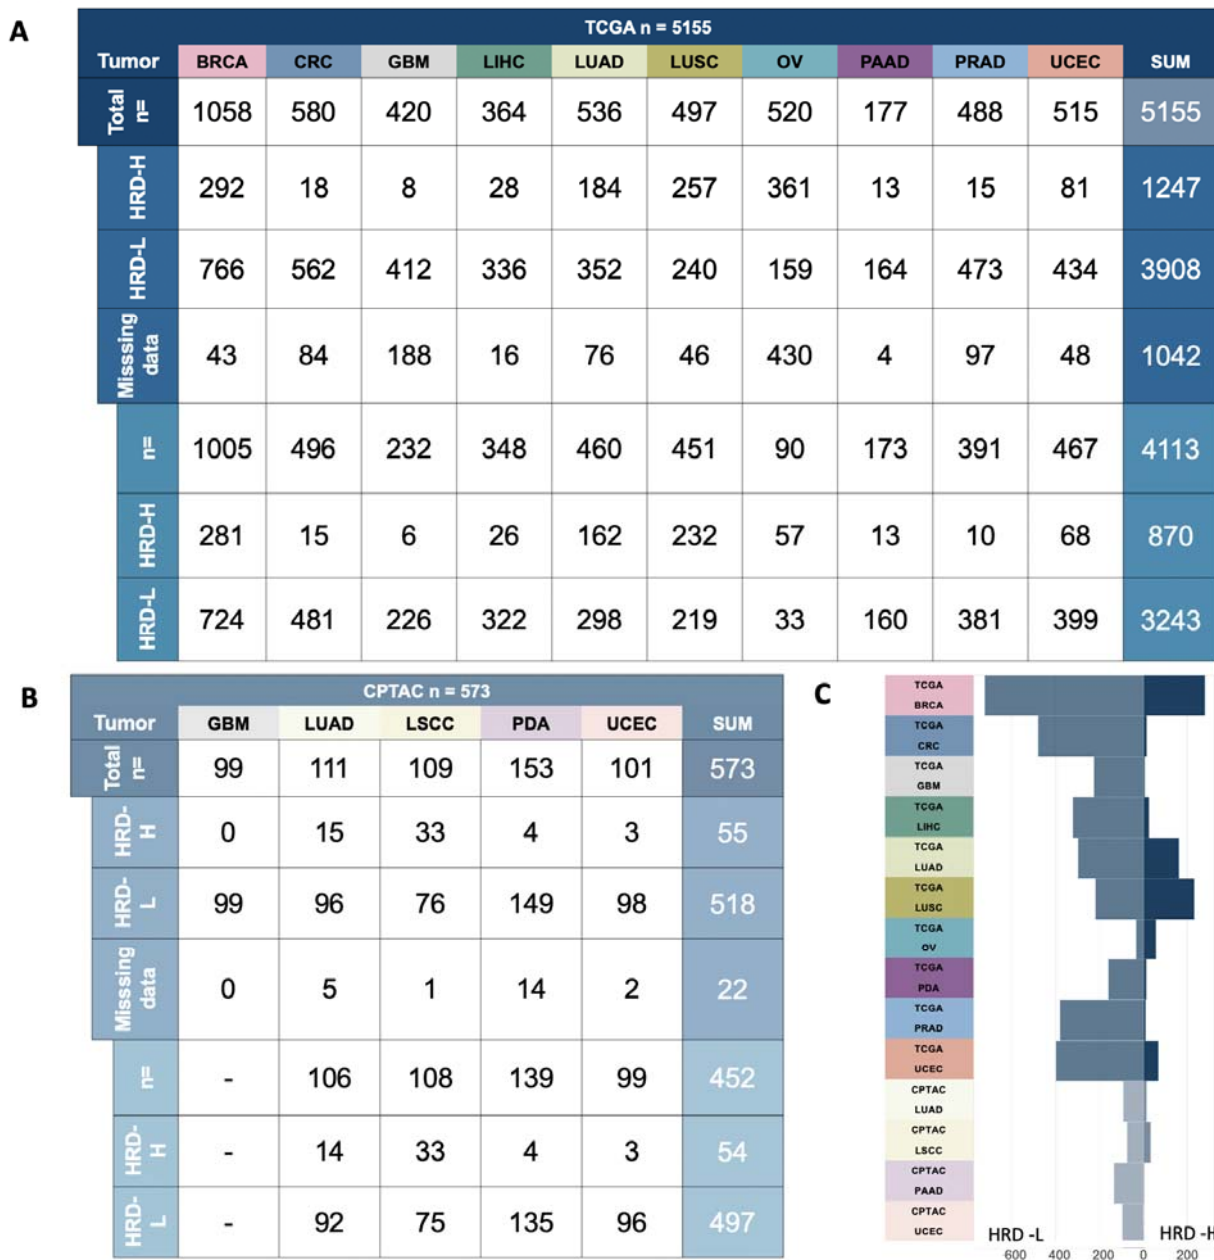

668

669

670 **Supplementary Figure 1: Homologous recombination deficiency prevalences across the**  
 671 **cohorts.** (A) Overview of the total patient count (n=573) in the CPTAC cohort before merging the image  
 672 data with the molecular data and afterward. (B) Overview of the total patient count (n=5,155) in the  
 673 TCGA cohort before merging the image data with the molecular data and afterward. (C) Distribution of  
 674 the homologous recombination deficiency high (HRD-H) and low (HRD-L) patient number among the  
 675 different tumor types of The Cancer Genome Atlas (TCGA) and Clinical Proteomic Tumor Analysis

676 Consortium (CPTAC). Abbreviations: BRCA=breast invasive carcinoma; CRC=colorectal cancer;  
 677 GBM=glioblastoma; LIHC=liver cancer; LUAD=lung adenocarcinoma; LUSC/LSCC=lung squamous cell  
 678 carcinoma; OV=ovarian cancer; PAAD/PDA=pancreatic adenocarcinoma; PRAD=prostate  
 679 adenocarcinoma; UCEC=endometrial cancer  
 680

Internal 5 fold Cross Validation and tumor wise external validation ROCs

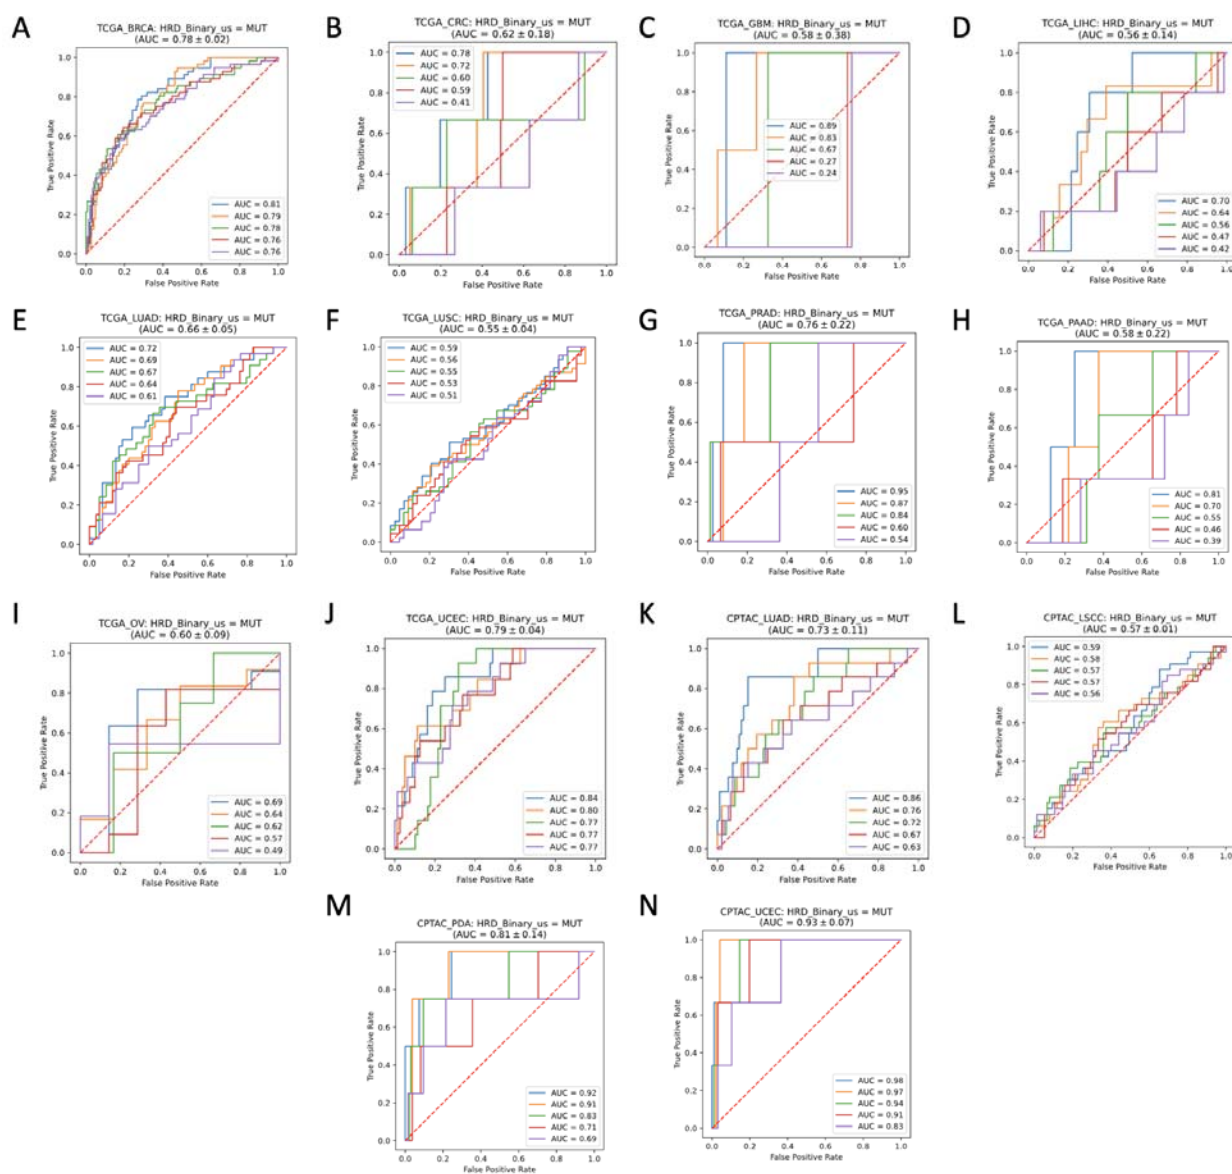

681  
 682 **Supplementary Figure 2: Receiving operating curve for the Internal Validation and tumor wise**  
 683 **external validation.** The Receiving operating curve (ROC) is shown for the five-fold internal cross-  
 684 validation experiment for each of the models in The Cancer Genome Atlas (TCGA) for the Homologous  
 685 recombination deficiency (HRD) binary score for (A) TCGA-BRCA, (B) TCGA-CRC, (C) TCGA-GBM,

686 (D) TCGA-LIHC, (E) TCGA-LUAD, (F) TCGA-LUSC, (G) TCGA-PAAD, (H) TCGA-PRAD, (I) TCGA-OV,  
 687 (J) TCGA-UCEC; Roc curves for the external validation on the Clinical Proteomic Tumor Analysis  
 688 Consortium (CPTAC) for each previously trained model for (K) CPTAC-LUAD, (L) CPTAC-LSCC, (M)  
 689 CPTAC-PDA, (N) CPTAC-UCEC. Abbreviations: BRCA=breast invasive carcinoma; CRC=colorectal  
 690 cancer; GBM=glioblastoma; LIHC=liver cancer; LUAD=lung adenocarcinoma; LUSC/LSCC=lung  
 691 squamous cell carcinoma; OV=ovarian cancer; PAAD/PDA=pancreatic adenocarcinoma;  
 692 PRAD=prostate adenocarcinoma; UCEC=endometrial cancer  
 693

### Cross cancer external validation ROCs

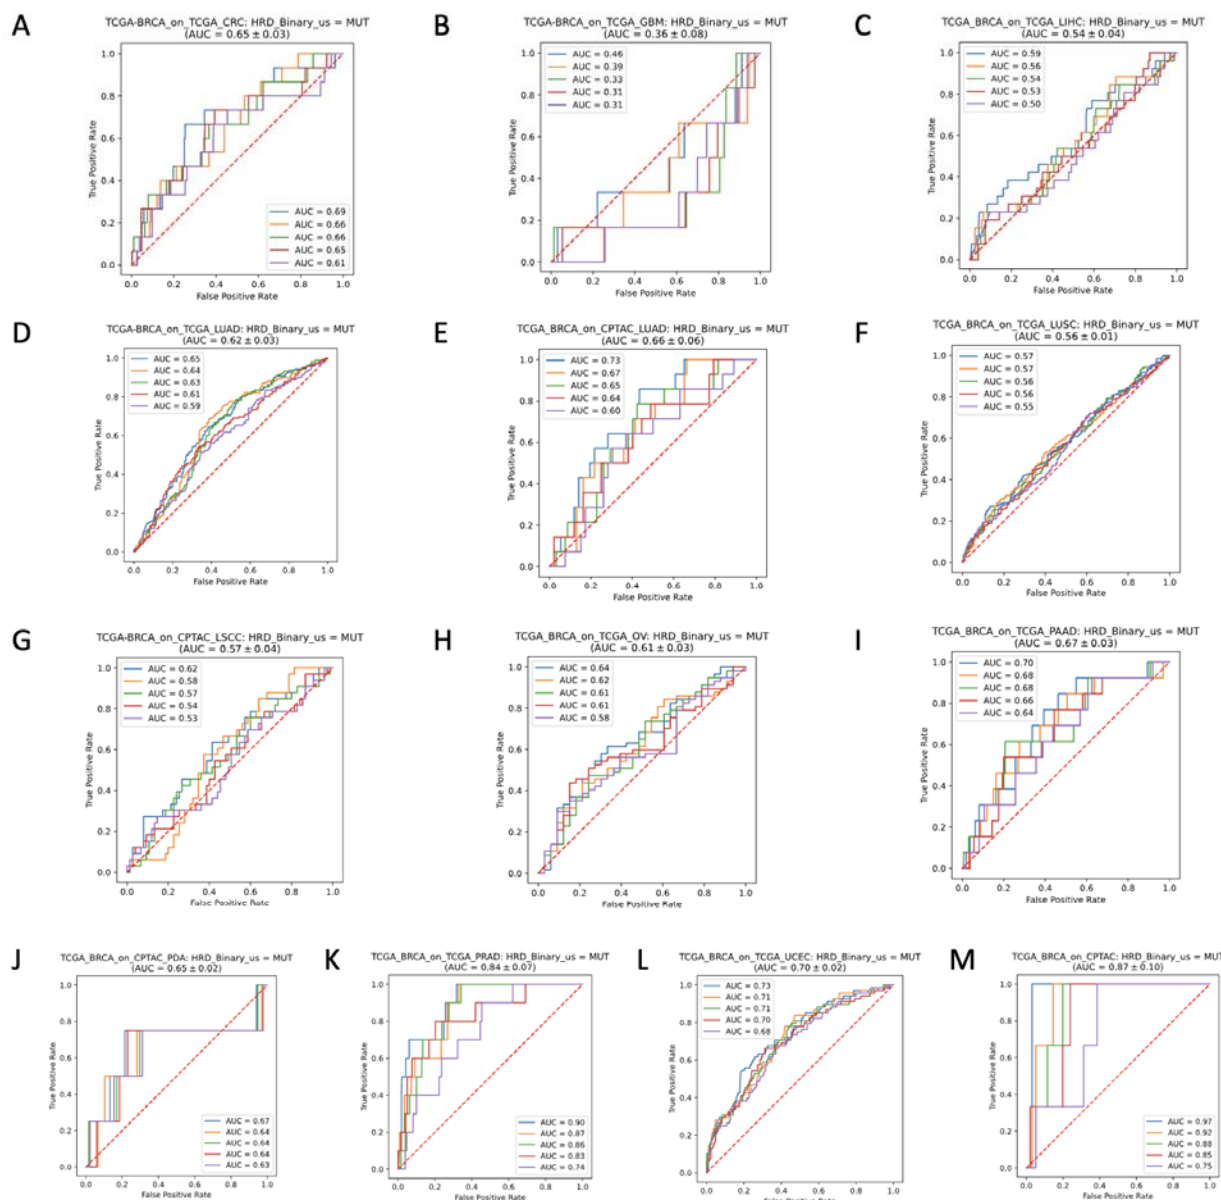

695

696 **Supplementary Figure 3: Receiving operating curve for the cross-cancer external validation.** The

697 Receiving operating curve (ROC) is shown for the cross-cancer external validation experiment for each

698 model trained on The Cancer Genome Atlas (TCGA) breast cancer (BRCA) cohort for the Homologous

699 recombination deficiency (HRD) binary score on (A) TCGA-CRC, (B) TCGA-GBM, (C) TCGA-LIHC, (D)

700 TCGA-LUAD, (E) CPTAC-LUAD, (F) TCGA-LUSC, (G) CPTAC-LSCC, (H) TCGA-OV, (I) TCGA-PAAD,

701 (J) CPTAC-PDA, (K) TCGA-PRAD, (L) TCGA-UCEC, (M) CPTAC-UCEC. Abbreviations: BRCA=breast

702 invasive carcinoma; CRC=colorectal cancer; GBM=glioblastoma; LIHC=liver cancer; LUAD=lung

703 adenocarcinoma; LUSC/LSCC=lung squamous cell carcinoma; OV=ovarian cancer;

704 PAAD/PDA=pancreatic adenocarcinoma; PRAD=prostate adenocarcinoma; UCEC=endometrial cancer

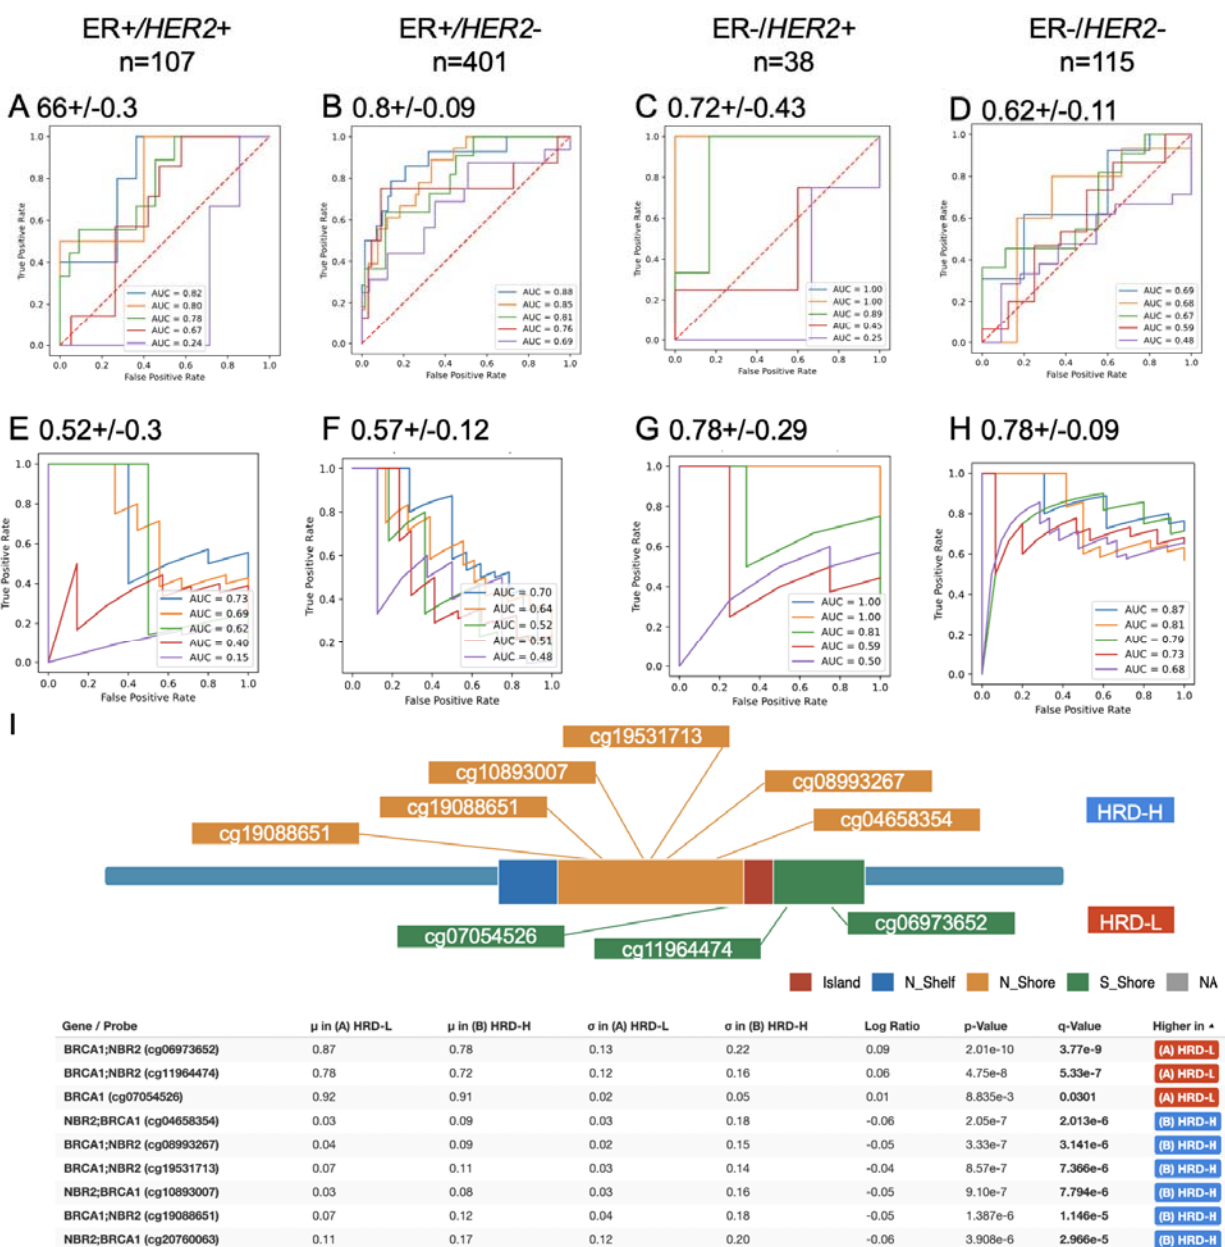

705  
706 **Supplementary Figure 4: Subgroup analysis and overview the *BRCA1* promotor methylations in**  
707 **TCGA-BRCA.** The Receiving operating curve (ROC) and Precision Recall curve (PRC) are shown for  
708 the five-fold internal cross-validation experiment for each of the models in The Cancer Genome Atlas -  
709 breast cancer (TCGA-BRCA) cohort for the Homologous recombination deficiency (HRD) score. ROC  
710 curve is represented for the four different subgroups (A) estrogen receptor positive (ER+) and *HER2+*  
711 (B) ER+ and *HER2-* (C) ER negative (ER-) and *HER2+* (D) ER- and *HER2-*. The PRC curve is shown  
712 for (E) ER+/HER2+, (F) ER+/HER2-, (G) ER-/HER2+, (H) ER-/HER2-. (I) Sketched representation of



713 the occurring promotor methylations (accessed with HM27 and HM450) in the *BRCA1* gene for the  
714 ground truth Homologous recombination deficiency high (HRD-H) and low (HRD-L) subgroups.

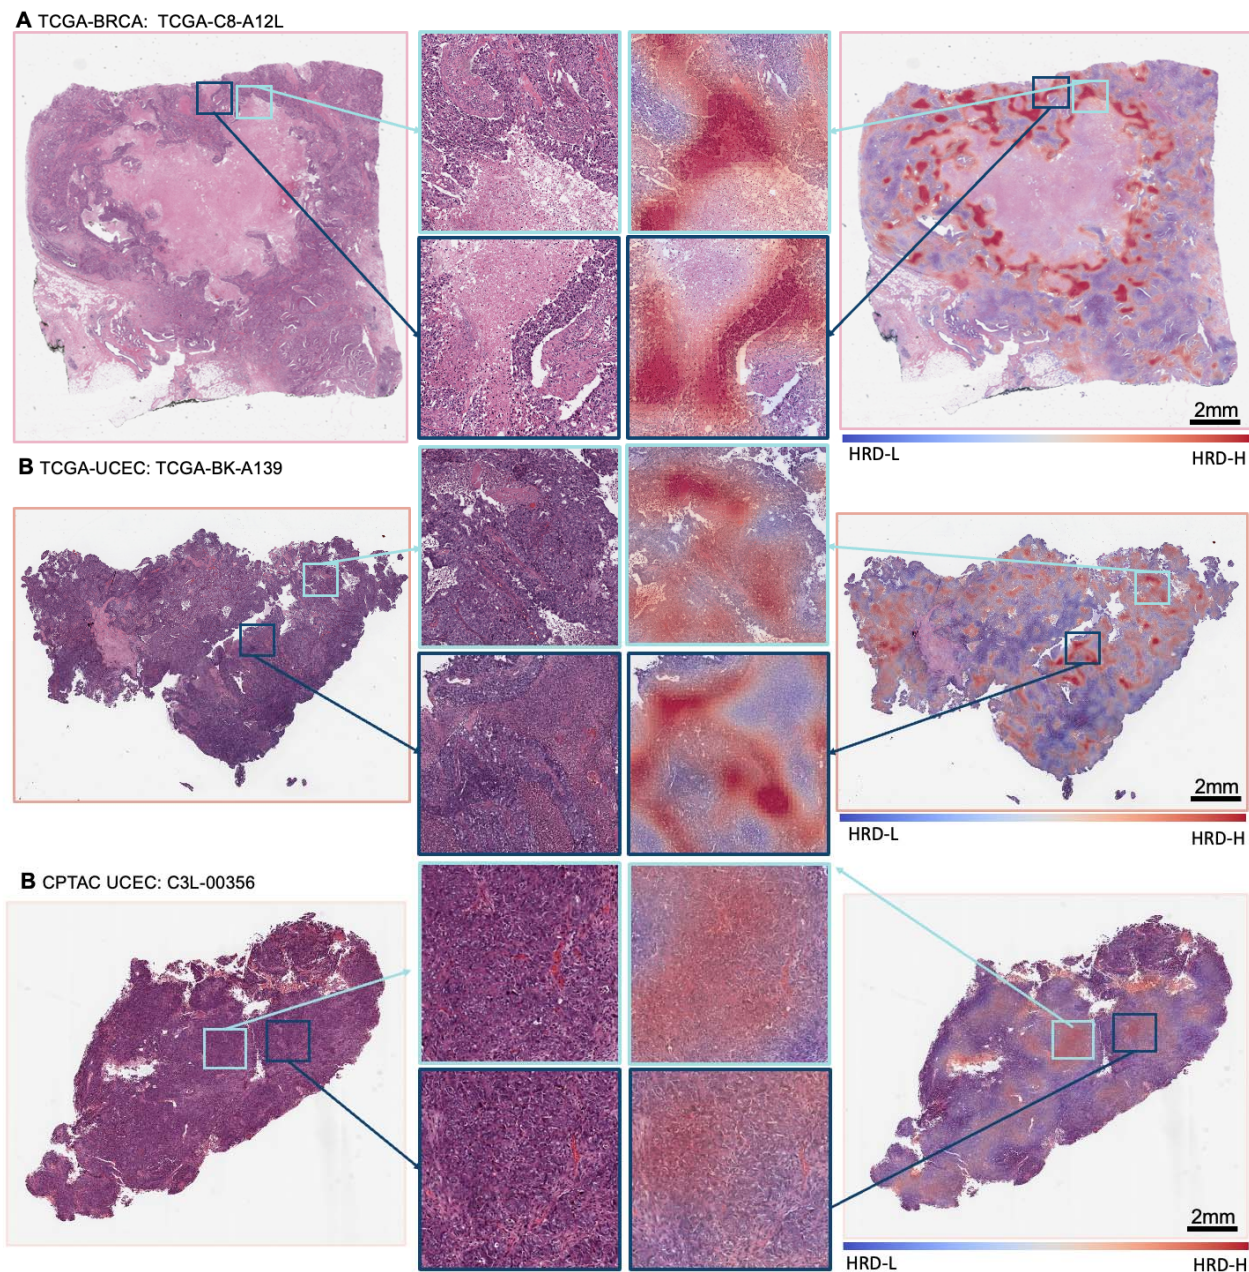

715  
716 **Supplementary Figure 5: Morphological features of Homologous recombination deficiency in**  
717 **breast and endometrial cancer.** Whole Slide Image (WSI) and classification heatmap (ground truth:  
718 Homologous recombination deficiency high (HRD-H) and prediction: HRD-H) with magnifications of two  
719 different regions. The model was trained on The cancer genome atlas (TCGA) breast cancer (BRCA)  
720 cohort and deployed cross cancer wise. Top true positive predicted patients are shown for (A) TCGA-



721 BRCA, (B) Clinical Proteomic Tumor Analysis Consortium (CPTAC) endometrial cancer (UCEC) and  
722 (C) TCGA-UCEC.

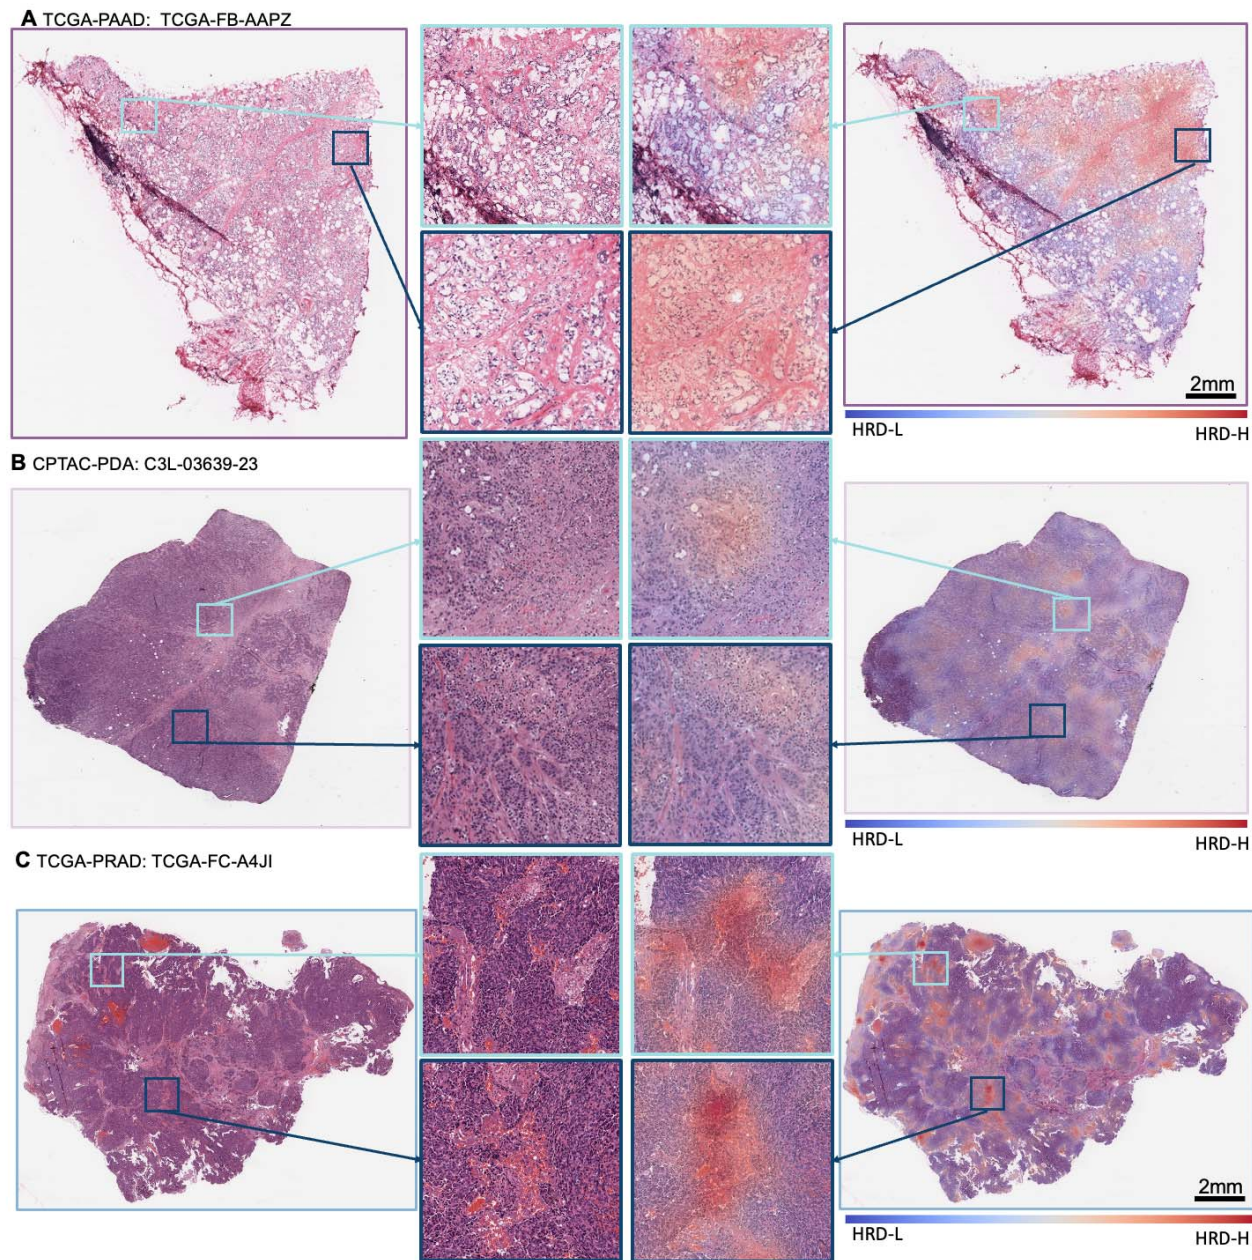

723  
724 **Supplementary Figure 6: Morphological features of Homologous recombination deficiency in**  
725 **pancreatic and prostate adenocarcinoma.** Whole Slide Image (WSI) and classification heatmap  
726 (ground truth: Homologous recombination deficiency high (HRD-H) and prediction: HRD-H) with  
727 magnifications of two different regions. The model was trained on The cancer genome atlas (TCGA)  
728 breast cancer (BRCA) cohort and deployed cross cancer wise. Top true positive predicted patients are  
729 shown for (A) TCGA pancreatic adenocarcinoma (PAAD), (B) Clinical Proteomic Tumor Analysis

730 Consortium (CPTAC) pancreatic adenocarcinoma (PDA) and (C) TCGA prostate adenocarcinoma  
731 (PRAD).

732  
733 **Supplementary Table 1: All raw statistical results.** All raw experimental results related to Figure 2,  
734 including receiving operating curve (ROC) with 95% confidence interval (CI), Precision-Recall Curve  
735 (PRC) with 95% confidence interval (CI), p-values and Homologous recombination deficiency (HRD)  
736 high (HRD-H) and HRD-low (HRD-L) patient numbers based on the ground truth, for internal 5-fold  
737 cross-validation on The Cancer Genome Atlas (TCGA) external validation on Clinical Proteomic Tumor  
738 Analysis Consortium (CPTAC). [Supplementary\_Table\_1\_All\_statistical\_results.xlsx] in separate file

739  
740 **Supplementary Table 2: Homologous recombination deficiency score Tables.** Training data and  
741 calculated homologous recombination deficiency score (HRD) out of the three subscores loss of  
742 heterozygosity (LOH), telomeric allelic imbalance (TAI) and large-scale state transitions (LST) available  
743 as continuous (HRDsum) and binary (HRD\_Binary) target with a chosen cut off of  $HRD-L < 42$   $HRD-H \geq 42$   
744 for patients of The Cancer Genome Atlas (TCGA, Sheet1) and Clinical Proteomic Tumor  
745 Analysis Consortium (CPTAC, Sheet2).

746  
747 **Supplementary Table 3: Weblink for customized Homologous recombination deficiency (HRD)**  
748 **subgroups.** Weblink for accessing the clinical and molecular characteristics for both ground truth and  
749 prediction Homologous recombination Deficiency (HRD) subgroups at [www.cbioportal.org](http://www.cbioportal.org) for The  
750 Cancer Genome Atlas breast cancer (TCGA-BRCA) Pan Cancer Atlas 2018 study and the TCGA-  
751 BRCA Firehose Legacy cohort.
